# Supplementary material for: Inhibition of p38 MAPK regulates epileptic severity by decreasing expression levels of A1R and ENT1
Source: PubMed Central journal article supplement — Mol Med Rep. 2020 Oct 19;22(6):5348–57. doi: 10.3892/mmr.2020.11614 (PMC7647013; doi:10.3892/mmr.2020.11614), 2020-10-19

Figure S1. Immunohistochemical staining for aA1R in the hippocampus of rats in the SE and DMSO groups (3 days). There was no difference in the number of positive cells between SE group and DMSO group. A1R-positive neurons. n=5 in each group. Scale bar, 1 mm. A1R, adenosine A1 receptor; SE, status epilepticus; DG, dentate gyrus.

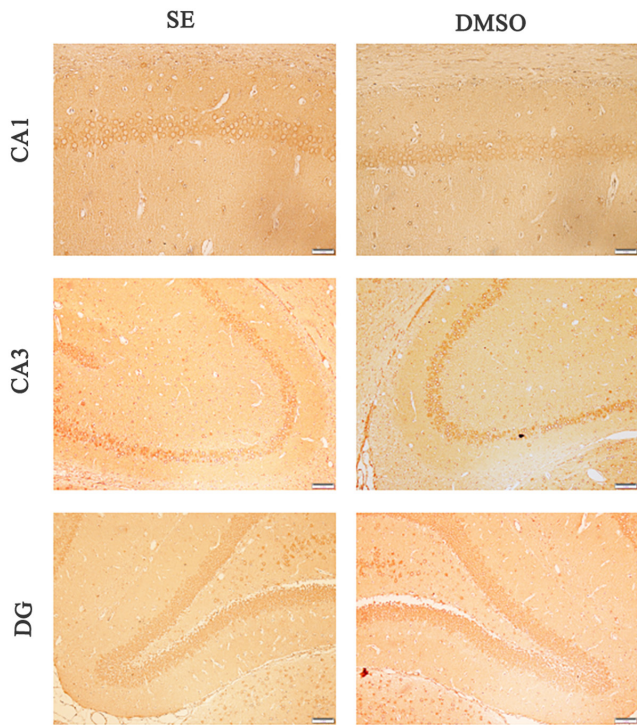

Figure S2. Statistical analysis of immunohistochemistry data showed that the percentage of A1R-positive cells no significantly difference in the SE group compared with the DMSO group. n=5 in each group. A1R, adenosine A1 receptor; SE, status epilepticus.

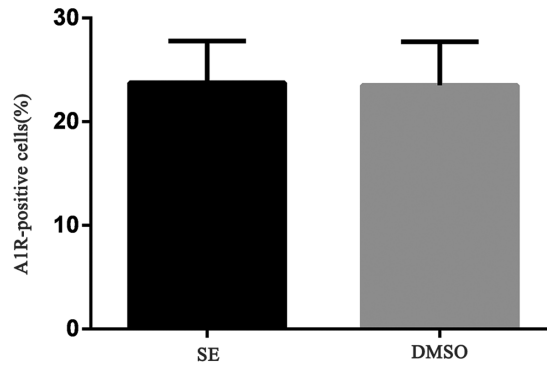

Supplement: Supplementary_Data.pdf [file Supplementary_Data.pdf]
